# Supplementary material for: Effects of the scid mutation on X-ray-induced deletions in the brain and spleen of gpt delta mice
Source: Genes Environ. 2020 May 24;42:19. doi: 10.1186/s41021-020-00158-y (PMC7247204; doi:10.1186/s41021-020-00158-y)
Supplement: Supplementary file 1 — Additional file 1: Table S1. Spi− mutant frequency in the brain of X-ray-irradiated mice. Table S2. Spi− mutant frequency in the spleen of X-ray-irradiated mice. [file 41021_2020_158_MOESM1_ESM.xlsx]

## Sheet: Suppl tables
Suppl. table 1. Spi- mutant frequency in the brain of X-ray-irradiated mice
Genotype	Irradiation	Mouse	sex	Number of		Number of		Mutant		Average			Tukey-test
		ID		rescued phage		Spi- mutants		Frequency (×10-6)					vs 0 Gy		vs WT
wild type	0 Gy	1	f	3108000		2		0.643501
		2	f	1281000		1		0.78064
		3	f	2313000		2		0.864678
		4	f	1317000		1		0.759301
		5	f	3084000		3		0.972763
		6	f	1005000		1		0.995025
		101	m	3129000		7		2.23714
		102	m	2334000		0		0
		201	f	3462000		4		1.1554
		202	f	2580000		5		1.93798		1.03464	+-	0.638983
		Total		23613000		26
	10 Gy	103	m	4884000		30		6.14251
		104	m	4635000		30		6.47249
		105	m	3270000		17		5.19878
		106	m	4620000		27		5.84416
		203	f	4350000		17		3.90805
		204	f	4500000		17		3.77778
		205	f	3183000		13		4.0842
		206	f	4569000		21		4.59619		5.00302	+-	1.06325	*	P<0.001
		Total		34011000		172
scid/scid	0 Gy	7	f	1866000		1		0.535906
		8	f	1497000		3		2.00401
		9	f	1530000		2		1.30719
		10	f	2226000		1		0.449236
		11	f	2613000		1		0.382702
		12	f	2511000		1		0.398248		0.846215	+-	0.666691
		Total		12243000		9
	10 Gy	107	m	3546000		10		2.82008
		108	m	5193000		14		2.69594
		109	m	3882000		13		3.34879
		110	m	5985000		8		1.33668
		207	f	2100000		8		3.80952
		208	f	1221000		5		4.095
		209	f	4197000		9		2.14439		2.89291	+-	0.959105	*	P<0.001	*	P<0.001
		Total		26124000		67
Suppl. table 2. Spi- mutant frequency in the spleen of X-ray-irradiated mice
Genotype	Irradiation	Mouse	sex	Number of		Number of		Mutant		Average			Tukey-test
		ID		rescued phage		Spi- mutants		Frequency (×10-6)					vs 0 Gy
wild type	0 Gy	1	f	1734000		4		2.30681
		3	f	1068000		5		4.68165
		4	f	726000		3		4.13223
		5	f	1557000		2		1.28452
		6	f	1422000		2		1.40647
		101	m	3372000		7		2.07592
		102	m	1942000		7		3.60453
		201	f	3010500		3		0.996512
		202	f	1884000		5		2.65393		2.5714	+-	1.31208
		Total		16715500		38
	10 Gy	103	m	2347500		8		3.40788
		104	m	1281000		4		3.12256
		105	m	1776000		10		5.63063
		106	m	1983000		8		4.03429
		203	f	1603000		9		5.61447
		204	f	2350500		14		5.95618
		205	f	1587000		6		3.78072
		206	f	1491000		10		6.70691		4.78171	+-	1.34699	*	P<0.01
		Total		14419000		69
scid/scid	0 Gy	7	f	1422000		2		1.40647
		8	f	1110000		2		1.8018
		9	f	6060000		7		1.15512
		10	f	5713500		7		1.22517
		11	f	4041000		7		1.73224
		12	f	4659000		5		1.07319		1.399	+-	0.306335
		Total		23005500		30
	10 Gy	107	m	2683500		3		1.11794
		108	m	1272000		3		2.35849
		109	m	2988000		17		5.68942
		110	m	936000		5		5.34188
		207	f	1900500		10		5.26177
		208	f	1275000		5		3.92157
		209	f	963000		5		5.19211		4.12617	+-	1.75895	*	P<0.01
		Total		12018000		48
